# Supplementary material for: Exploring the hemoglobin-to-red blood cell distribution width ratio (HRR) to clinical complications of KD nexus:a retrospective cohort study
Source: Research Square preprint supplement (doi:10.21203/rs.3.rs-7956351/v1), 2025-12-02
Supplement: Supplementary file 1 [file ba66cdd4e195cc4a774a07ae.docx]

###### (Table 5)Comparison of laboratory tests between KD patients with coronary artery damage and KD patients without coronary artery damage

|  |  | Coronary artery no damage(1321) | Coronary artery damage (445) | P value |
| --- | --- | --- | --- | --- |
| Age |  | 22.68(12.53,39.95) | 20(9.17,35.71) | 0.006 |
| Gender | male | 815(61.7) | 302(67.9) | 0.02 |
|  | female | 506(38,3) | 143(32,1) |  |
| Laboratory Examination | | | | |
| RDW |  | 12.9(12.4,13.5) | 13.1(12.5,13.8) | <0.001 |
| HRR |  | 0.88(0.80,0.94) | 0.83(0.76,0.90) | <0.001 |
| HB |  | 113(107,119) | 109(102,116) | <0.001 |
| CRP |  | 72(37.24,108) | 79.9(47.7,121.13) | 0.001 |
| WBC |  | 14.71(11.2,18.62) | 15.09(11.66,19.73) | 0.075 |
| HCT |  | 0.339(0.32,0.357) | 0.328(0.31，0.35) | <0.001 |
| PLT |  | 359(290,437) | 388(307,495) | <0.001 |
| Neutrophils |  | 9.559(7.006,12.971) | 9.667(6.957,12.734) | 0.902 |
| Lymphocytes |  | 3.28(2.102,4.813) | 3.736(2.52,5.228) | <0.001 |
| ESR |  | 36(26,45) | 37(27,48) | 0.393 |
| ALT |  | 28(16,83) | 34(18,80) | 0.055 |
| AST |  | 33(25,51) | 31(24,51) | 0.374 |
| albumin |  | 40.2(36.9,42.9) | 39.2(36.2,42.2) | 0.004 |
| D-dimer |  | 1.31(0.8,2.15) | 1.35(0.9,2.21) | 0.413 |
| BNP |  | 615(257,1690) | 937(348,2330) | <0.001 |

Statistically significant (P < 0.05).

###### (Table 6)Comparison between KD patients with and without liver damage; Comparison between KD patients with concurrent pulmonary complications and those without concurrent pulmonary complications

|  |  | No liver damage(1272) | with liver damage(619) | P value |  |  | No pulmonary complications(1573) | with pulmonary complications(318) | P value |
| --- | --- | --- | --- | --- | --- | --- | --- | --- | --- |
| Age |  | 21.5(11.17,39.07) | 21(12.4,37.83) | 0.651 | Age |  | 19.85(11.29,33) | 16.61(7.43,28.13) | <0.001 |
| gender | male | 822(64.6) | 375(60.6) | 0.087 | gender | male | 992(63.1) | 205(64.5) | 0.636 |
|  | female | 450(35.4) | 244(39.4) |  |  | female | 581(36.9) | 113(35.5) |  |
| Laboratory Examination | | | | | | | | | |
| RDW |  | 12.9(12.4,13.6) | 13(12.5,13.6) | 0.019 | RDW |  | 12.9(12.4，13.6) | 13(12.4，13.7) | 0.565 |
| HRR |  | 0.86(0.78,0.93) | 0.87(0.8,0.93) | 0.042 | HRR |  | 0.87(0.79，0.94) | 0.84(0.76，0.92) | 0.001 |
| HB |  | 111(104,118) | 113(107,120) | <0.001 | HB |  | 112(106，119) | 111(102，116) | <0.001 |
| CRP |  | 68(33.3,105.49) | 86(55.9,130) | <0.001 | CRP |  | 74.4(40,110) | 74.6(43.5，119) | 0.314 |
| WBC |  | 14.75(11.3,18.91) | 15.37(11.8,19.07) | 0.116 | WBC |  | 14.97(11.59，19.01) | 14.8(10.82，18.65) | 0.158 |
| HCT |  | 0.334(0.314,0.354) | 0.341(0.322,0.36) | <0.001 | HCT |  | 33.8(32，35.7) | 33(30.8，35) | <0.001 |
| PLT |  | 384(309,474) | 339(282,414) | <0.001 | PLT |  | 366(298，450) | 375(292，467) | 0.789 |
| Neutrophils |  | 9.231(6.669，12.477) | 10.67(7.935,13.929) | <0.001 | ANC |  | 9.883(7.17，13.122) | 9.145(6.231，12.473) | 0.014 |
| Lymphocytes |  | 3.656(2.45,5.2) | 2.84(1.839,4.375) | <0.001 | Lymphocytes |  | 3.37(2.215-4.865) | 3.552(2.169-5.334) | 0.327 |
| ESR |  | 35(25,45) | 37(29,48) | <0.001 | ESR |  | 37(27，46) | 34(24，44) | 0.01 |
| ALT |  | 31(16,86) | 35(18,83.8) | <0.001 | ALT |  | 30(16，87) | 34(17，78) | 0.777 |
| AST |  | 33(25,52) | 34.5(26,55.8) | <0.001 | AST |  | 33(25，52) | 33(25，54) | 0.631 |
| albumin |  | 40.2(36.9,42.9) | 39.6(36.1,42.3) | 0.009 | albumin |  | 40.2(37，42.8) | 38.85(35，41.8) | <0.001 |
| D-dimer |  | 1.23(0.74,2.02) | 1.6(1.05,2.61) | <0.001 | D-dimer |  | 1.35(0.86，2.18) | 1.29(0.81，2.25) | 0.807 |
| BNP |  | 520(221,1350) | 1290(543,2960) | <0.001 | BNP |  | 659(276，1770) | 906(322，2330) | 0.007 |

Data were expressed as n (%) and median (interquartile range).

HRR=hemoglobin-to-red blood cell distribution width ratio;RDW=red blood cell distribution width;CRP=C-reactive-protein;HB=hemoglobin,HCT=hematocrit,PLT=platelet,ESR=erythrocyte sedimentation rate;ALT=alanine aminotransferase;AST=aspartate aminotransferase;WBC= white blood cell count;IVIG= intravenous immunoglobulin.

Statistically significant (P < 0.05).

###### (Table 7) Comparison between KD children with and without digestive system problems; Comparison between KD children with and without concurrent aseptic meningitis

|  |  | No digestive system problems(1729) | With digestive system problems(162) | P value |  |  | No aseptic meningitis(1853) | with aseptic meningitis(38) | Value |
| --- | --- | --- | --- | --- | --- | --- | --- | --- | --- |
| Age |  | 22.279(12.11,39.43) | 16.47(7.13,35.48) | 0.001 | Age |  | 21.3(11.78,38.6) | 28.25(9.42,59.86) | 0.1 |
| gender | male | 1092(63.2) | 105(64.8) | 0.676 | gender | male | 1173(63.3) | 680(36.7) | 0.985 |
|  | female | 637(36.8) | 57(35.2) |  |  | female | 24(63.2,) | 14(36.8) |  |
| Laboratory Examination | | | | | | | | | |
| RDW |  | 12.9(12.4,13.6) | 13(12.4,13.525) | 0.987 | RDW |  | 12.9(12.4,13.6) | 12.6(12,13.3) | 0.015 |
| HRR |  | 0.87(0.79,0.93) | 0.84(0.76,0.91) | 0.014 | HRR |  | 0.86(0.79,0.93) | 0.9(0.82,0.98) | 0.034 |
| HB |  | 112(106,119) | 110(102,117) | 0.003 | HB |  | 112(105,118) | 112.5(106.8,122.2) | 0.285 |
| CRP |  | 73.97(39.6,110.67) | 85.4(48.75,128.52) | 0.006 | CRP |  | 74.2(40,111.3) | 90.2(45.8,147) | 0.085 |
| WBC |  | 14.82(11.3,18.94) | 15.53(12.47,19.6) | 0.118 | WBC |  | 14.97(11.45,19) | 14.09(10.65,19.6) | 0.363 |
| HCT |  | 0.337(0.319,0.357) | 0.33(0.308,0.33) | 0.001 | HCT |  | 0.337(0.318,，0.356) | 0.341(0.319,0.365) | 0.271 |
| PLT |  | 366(295,449) | 383(322,489) | 0.028 | PLT |  | 369(298,455) | 318(238.8,396.8) | 0.011 |
| Neutrophils |  | 9.708(7.023,13.049) | 9.717(7.721,13.003) | 0.527 | Neutrophils |  | 9.672(7.05,13.011) | 11.073(8.012,16.06) | 0.073 |
| Lymphocytes |  | 3.401(2.214,4.867) | 3.523(2.211,5.487) | 0.274 | Lymphocytes |  | 3.464(2.271,4.951) | 1.719(1.141,2.21) | <0.001 |
| ESR |  | 36(27,46) | 37(25,52) | 0.503 | ESR |  | 36(26.5,46) | 39(26.5,59.3) | 0.135 |
| ALT |  | 30(16,85) | 34(19,94) | 0.273 | ALT |  | 30(16,83) | 86.5(22.3,197.3) | 0.004 |
| AST |  | 33(25,52) | 32..5(24,48) | 0.772 | AST |  | 33(25,51) | 50(30,98.3) | 0.003 |
| Albumin |  | 40(36.7,42.7) | 39.7(36.1,42.3) | 0.298 | Albumin |  | 40(36.7,42.7) | 39.8(35.8,42.3) | 0.82 |
| D-dimer |  | 1.31(0.81,2.18) | 1.54(0.99,2.62) | 0.1 | D-dimer |  | 1.34(0.82,2.18) | 2(0.78,2.77) | 0.123 |
| BNP |  | 660(274,1770) | 1170(407,3042) | <0.001 | BNP |  | 682(281,1835) | 980(308,3430) | 0.112 |

Data were expressed as n (%) and median (interquartile range).

HRR=hemoglobin-to-red blood cell distribution width ratio;RDW=red blood cell distribution width;CRP=C-reactive-protein;HB=hemoglobin,HCT=hematocrit,PLT=platelet,ESR=erythrocyte sedimentation rate;ALT=alanine aminotransferase;AST=aspartate aminotransferase;WBC= white blood cell count;IVIG= intravenous immunoglobulin.

Statistically significant (P < 0.05).

###### (Table 8) Multivariate logistic regression model for various complications in KD patients

|  | Variates | β | Standard Error | wald | significance | OR | 95%CI | |
| --- | --- | --- | --- | --- | --- | --- | --- | --- |
|  |  |  |  |  |  |  | lower limit | upper limit |
| Is there any damage to the coronary artery | | | | | | | | |
|  | age | 0.005 | 0.003 | 4.111 | 0.043 | 1.005 | 1 | 1.011 |
|  | sex | -0.244 | 0.121 | 4.072 | 0.044 | 0.784 | 0.619 | 0.993 |
|  | HRR | -1.001 | 0.414 | 5.858 | 0.016 | 0.368 | 0.163 | 0.827 |
|  | RDW | -0.437 | 0.23 | 3.618 | 0.057 | 0.646 | 0.412 | 1.013 |
|  | CRP | 0.002 | 0.001 | 3.13 | 0.077 | 1.002 | 1 | 1.004 |
|  | WBC | -0.021 | 0.013 | 2.829 | 0.093 | 0.979 | 0.955 | 1.003 |
|  | HB | 0.041 | 0.035 | 1.379 | 0.24 | 1.041 | 0.973 | 1.114 |
|  | HCT | 0.026 | 0.046 | 0.322 | 0.57 | 1.026 | 0.938 | 1.123 |
|  | PLT | 0.002 | 0 | 18.29 | 0.001 | 1.002 | 1.001 | 1.003 |
|  | Lymphocytes | 0.071 | 0.035 | 4.172 | 0.041 | 1.074 | 1.003 | 1.15 |
|  | ALT | 0.001 | 0.001 | 2.474 | 0.116 | 1.001 | 1 | 1.002 |
|  | albumin | 0.002 | 0.012 | 0.029 | 0.864 | 1.002 | 0.979 | 1.026 |
|  | BNP | 0.001 | 0.001 | 8.456 | 0.004 | 1 | 1 | 1 |
| liver damage | | | | | | | | |
|  | HRR | -0.708 | 0.43 | 2.717 | 0.099 | 0.493 | 0.212 | 1.143 |
|  | RDW | -0.308 | 0.253 | 1.49 | 0.222 | 0.735 | 0.448 | 1.205 |
|  | CRP | 0.002 | 0.001 | 3.6 | 0.058 | 1.002 | 1 | 1.004 |
|  | HB | 0.052 | 0.036 | 2.119 | 0.145 | 1.053 | 0.982 | 1.129 |
|  | HCT | 0.114 | 0.044 | 6.818 | 0.009 | 1.121 | 1.029 | 1.221 |
|  | PLT | -0.002 | 0.001 | 14.807 | 0.001 | 0.998 | 0.997 | 0.999 |
|  | Neutrophils | 0.034 | 0.012 | 8.285 | 0.004 | 1.034 | 1.011 | 1.058 |
|  | Lymphocytes | -0.09 | 0.03 | 9.132 | 0.003 | 0.914 | 0.862 | 0.969 |
|  | ESR | 0.011 | 0.003 | 10.442 | 0.001 | 1.011 | 1.004 | 1.018 |
|  | albumin | -0.007 | 0.011 | 0.387 | 0.534 | 0.993 | 0.972 | 1.015 |
|  | D-dimer | 0.088 | 0.028 | 9.647 | 0.002 | 1.092 | 1.033 | 1.154 |
|  | BNP | 0.001 | 0.001 | 20.835 | 0.001 | 1 | 1 | 1 |
| Concurrent intestinal diseases | | | | | | | | |
|  | age | -0.006 | 0.004 | 1.87 | 0.172 | 0.994 | 0.986 | 1.002 |
|  | HRR | 0.135 | 0.149 | 0.825 | 0.364 | 1.145 | 0.855 | 1.533 |
|  | CRP | 0.002 | 0.001 | 1.615 | 0.204 | 1.002 | 0.999 | 1.005 |
|  | HB | 0.002 | 0.029 | 0.004 | 0.947 | 1.002 | 0.947 | 1.06 |
|  | HCT | -0.104 | 0.076 | 1.862 | 0.172 | 0.901 | 0.776 | 1.047 |
|  | PLT | 0.001 | 0.001 | 5.772 | 0.016 | 1.001 | 1 | 1.003 |
|  | D-dimer | 0.035 | 0.039 | 0.825 | 0.364 | 1.036 | 0.96 | 1.117 |
|  | BNP | 0.001 | 0.001 | 5.169 | 0.023 | 1 | 1 | 1 |
| Concurrent aseptic meningitis | | | | | | | | |
|  | age | 0.001 | 0.006 | 0.001 | 0.973 | 1 | 0.987 | 1.013 |
|  | HRR | -0.098 | 0.563 | 0.03 | 0.862 | 0.907 | 0.301 | 2.732 |
|  | CRP | 0.001 | 0.003 | 0.007 | 0.935 | 1 | 0.994 | 1.006 |
|  | HCT | 0.067 | 0.143 | 0.222 | 0.638 | 1.069 | 0.809 | 1.414 |
|  | PLT | 0.002 | 0.002 | 1.234 | 0.267 | 1.002 | 0.999 | 1.005 |
|  | RDW | -0.105 | 0.446 | 0.056 | 0.814 | 0.9 | 0.376 | 2.156 |
|  | Neutrophils | 0.038 | 0.033 | 1.348 | 0.246 | 1.039 | 0.974 | 1.109 |
|  | Lymphocytes | -0.706 | 0.163 | 18.675 | 0.001 | 0.494 | 0.359 | 0.68 |
|  | ALT | 0.001 | 0.002 | 0.27 | 0.603 | 1.001 | 0.997 | 1.005 |
|  | AST | -0.001 | 0.002 | 0.16 | 0.689 | 0.999 | 0.995 | 1.003 |
| Pulmonary complications | | | | | | | | | |
|  | HRR | 0.112 | 0.111 | 1.022 | 0.312 | 1.119 | 0.9 | 1.392 | |
|  | Age | -0.008 | 0.003 | 6.896 | 0.009 | 0.992 | 0.985 | 0.998 | |
|  | HB | -0.022 | 0.021 | 1.173 | 0.279 | 0.978 | 0.939 | 1.018 | |
|  | HCT | -0.014 | 0.054 | 0.066 | 0.797 | 0.986 | 0.887 | 1.096 | |
|  | Neutrophils | -0.035 | 0.014 | 6.241 | 0.012 | 0.966 | 0.94 | 0.993 | |
|  | ESR | -0.008 | 0.004 | 3.3 | 0.069 | 0.993 | 0.984 | 1.001 | |
|  | Albumin | -0.04 | 0.013 | 9.099 | 0.003 | 0.961 | 0.937 | 0.986 | |
|  | BNP | 0.001 | 0.001 | 5.331 | 0.021 | 1 | 1 | 1 | |

Abbreviations: HRR=hemoglobin-to-red blood cell distribution width ratio;RDW=red blood cell distribution width;CRP=C-reactive-protein;HB=hemoglobin,HCT=hematocrit,PLT=platelet,ESR=erythrocyte sedimentation rate;ALT=alanine aminotransferase;AST=aspartate aminotransferase;WBC= white blood cell count;IVIG= intravenous immunoglobulin.

Statistically significant (P < 0.05).

**(Table 9) The effectiveness of HRR critical values in predicting various complications in KD patients**

|  | Diagnostic test | Gold standard |  |  | Sen | Spe | PPV | NPV | Diagnostic accuracy | OR(95% CI) | P-value |
| --- | --- | --- | --- | --- | --- | --- | --- | --- | --- | --- | --- |
| liver damage | HRR＞0.79 | Positive  Negative | 491  128 | 916  356 | 0.79 | 0.29 | 0.35 | 0.74 | 0.45 | 1.491(1.185-1.876) | 0.001 |
| Coronary artery damage | HRR<0.86 | Positive  Negative | 282  163 | 574  747 | 0.64 | 0.57 | 0.33 | 0.82 | 0.58 | 0.437 (0.35-0.546) | <0.001 |
| digestive system problems | HRR<0.82 | Positive  Negative | 72  90 | 557  1172 | 0.46 | 0.68 | 0.11 | 0.93 | 0.66 | 0.549 (0.429-0.823) | 0.002 |
| Aseptic meningitis | HRR＞0.9 | Positive  Negative | 22  16 | 678  1175 | 0.55 | 0.64 | 0.03 | 0.99 | 0.63 | 2.141(1.122-4.086) | 0.021 |
| Pulmonary complications | HRR<0.84 | Positive  Negative | 154  164 | 586  987 | 0.49 | 0.63 | 0.21 | 0.86 | 0.6 | 0.623(0.489-0.794) | 0.001 |

HRR=hemoglobin-to-red blood cell distribution width ratio;RDW=red blood cell distribution width;CRP=C-reactive-protein;HB=hemoglobin,HCT=hematocrit,PLT=platelet,ESR=erythrocyte sedimentation rate;ALT=alanine aminotransferase;AST=aspartate aminotransferase;WBC= white blood cell count;IVIG= intravenous immunoglobulin;NPV, negative predictive value; OR, odds ratio; PPV: positive predictive value;Sen, sensitivity; Spe, specificity.

Statistically significant (P < 0.05).
